# Supplementary material
Source: bioRxiv or medRxiv preprint supplement (https://medrxiv.org/highwire/filestream/83775/field_highwire_adjunct_files/0/2020.05.31.20118679-1.pdf)

## Delirium Incidence, Duration and Severity in Critically Ill Patients with COVID-19

**Supplementary Table 1.** Laboratory Values and Hemodynamic Characteristics of Patients Admitted with Novel Coronavirus to the Intensive Care Unit<sup>a</sup>

| Variable                                       | Total<br>(n=144)    | Delirium Positive<br>(n=106) | Delirium Negative<br>(n=38) | P value |
|------------------------------------------------|---------------------|------------------------------|-----------------------------|---------|
| <b>All ICU Patients</b>                        |                     |                              |                             |         |
| Sodium mmol/L, median (IQR)                    | 137.0 (135.0-139.5) | 137.0 (135.0-139.0)          | 137.0 (135.0-140.0)         | 0.888   |
| Hematocrit %, median (IQR)                     | 36.7 (32.0-40.9)    | 36.0 (30.0-40.0)             | 38.1 (34.4-42.0)            | 0.088   |
| Platelet count x10 <sup>3</sup> , median (IQR) | 216.0 (152.0-256.0) | 213.0 (145.0-252.0)          | 227.0 (185.0-278.0)         | 0.208   |
| Creatinine mg/dl, median (IQR)                 | 1.1 (0.8-1.8)       | 1.1 (0.8-1.9)                | 1.1 (0.8-1.7)               | 0.585   |
| Mean Arterial Pressure mmHg, median (IQR)      | 100.0 (88.0-112.0)  | 100.0 (87.0-112.0)           | 100.5 (92.0-115.0)          | 0.691   |

<sup>a</sup>Data presented is from laboratory values, arterial blood gas results, vitals, and other components of the electronic medical record (first 24 hours of intensive care unit admission).

**Supplementary Table 2.** Delirium rates and clinical outcomes for patients admitted to the intensive care unit during the 2009-1010 Influenza Pandemic.

| Outcomes                                                                   | 2010<br>(n=383) |
|----------------------------------------------------------------------------|-----------------|
| <b>Delirium Incidence and Subtypes</b>                                     |                 |
| Delirium incidence* (%)                                                    | 22.7            |
| Hypoactive delirium** (%)                                                  | 19.3            |
| Hyperactive delirium** (%)                                                 | 3.4             |
| <b>Coma and Level of Consciousness</b>                                     |                 |
| Coma*** (%)                                                                | 24.0            |
| Level of consciousness at ICU admission by average RASS score – median IQR | -0.3 (-2, 0)    |
| <b>Diagnoses****</b>                                                       |                 |
| Acute Respiratory failure (%)                                              | 26.6            |
| Acute renal failure (%)                                                    | 29.5            |
| Trauma (%)                                                                 | 15.9            |
| Hypoalbuminemia                                                            | 26.6            |
| <b>Clinical Outcomes</b>                                                   |                 |
| Underwent invasive mechanical ventilation (%)                              | 36.0            |
| Hospital mortality (%)                                                     | 3.4             |
| <b>Medication Orders*****</b>                                              |                 |
| Benzodiazepines (%)                                                        | 20.4            |
| Opioids (%)                                                                | 66.3            |

n: Unique patient admissions. \*Patients with delirium by positive CAM-ICU at any time during the follow up period (at first assessment or during subsequent screenings in the intensive care unit); \*\* Delirium subtypes determined based on first positive delirium screening. \*\*\*Coma defined by RASS score -4 or -5. \*\*\*\*Diagnoses extracted from the medical record. \*\*\*\*\*Medication orders indicate the percentage of patients with active orders. CAM-ICU: Confusion Assessment Method for the Intensive Care Unit. RASS: Richmond Agitation-Sedation Scale.

**Supplementary Figure 1.** Flow Diagram of Patients with COVID-19 Screened For Inclusion in the Cohort

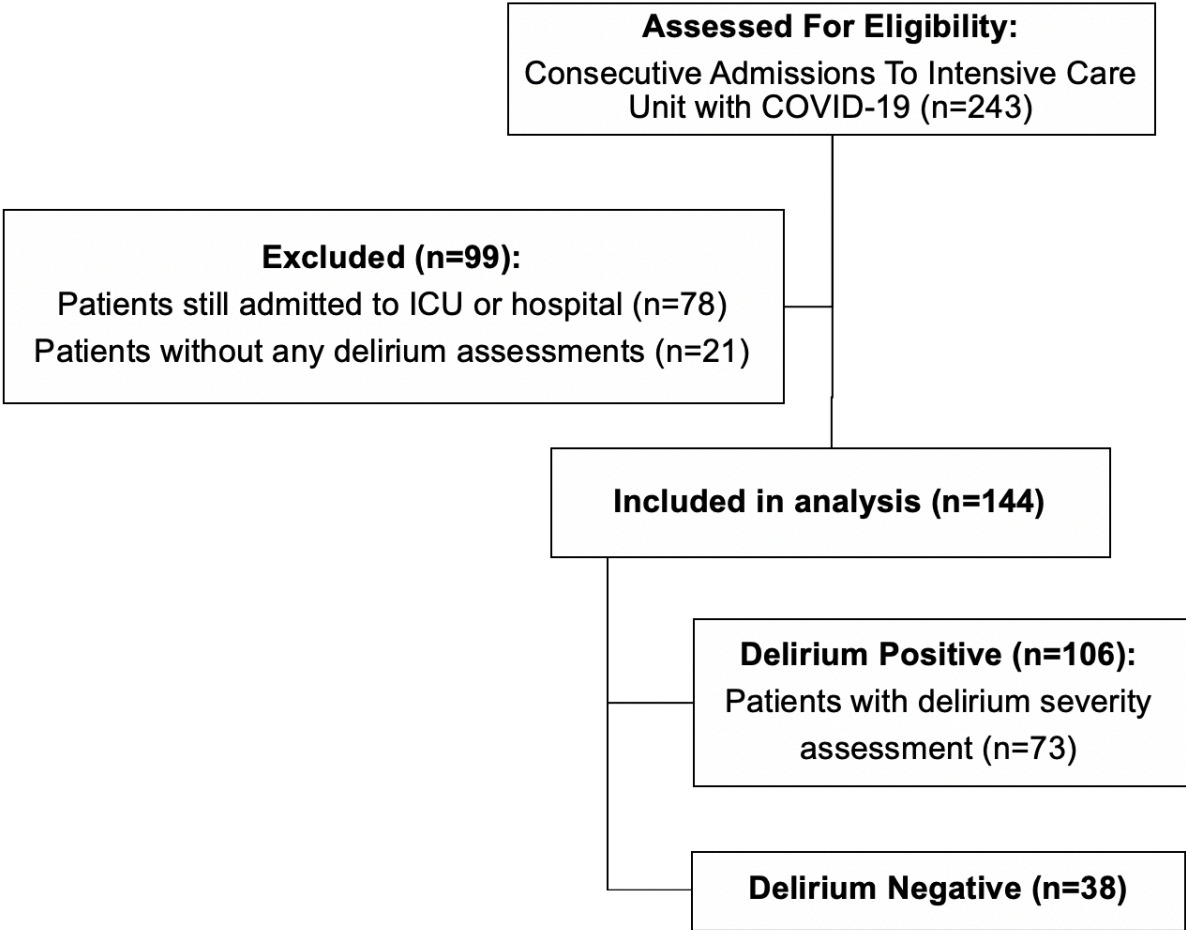

**Supplementary Figure 2.** Daily Rates of Patient's Discharge Status As Assessed Up to First 14 Days of Intensive Care Unit Stay (n=144)

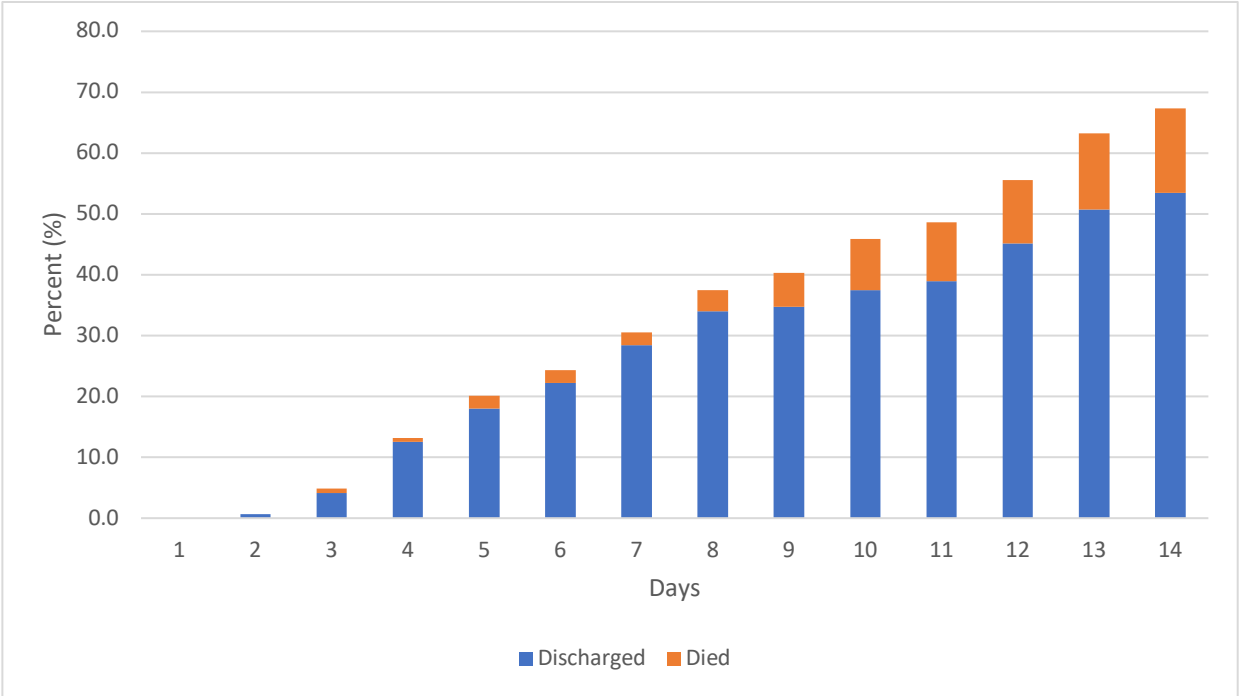

Supplement: Supplementary file [file 2020.05.31.20118679-1.pdf]
